# Supplementary material for: Translation, cross-cultural adaptation, and measurement properties of the Nepali version of the central sensitization inventory (CSI)
Source: PubMed Central journal article supplement (PMC7385946; doi:10.1186/s12883-020-01867-1), 2020-07-27
Supplement: 12883_2020_1867_MOESM1_ESM.pdf [file 12883_2020_1867_MOESM1_ESM.pdf]

## सेन्ट्रल सेन्सीटाइजेसन इनभेनटोरी (भाग - क)

कृपया हरेक वाक्यको दायोँतिर रहेको उचित उत्तरमा (√)चिन्ह लगाउनुहोस् ।

|                                                                                | कहिले पनि हुन्न | बिरलै | कहिले काहिँ | धेरै जसो | सधैँ |
|--------------------------------------------------------------------------------|-----------------|-------|-------------|----------|------|
| १. जब म सुतेर उठ्छु, म थकित र ताजगी नभएको महशुस गर्दछु ।                       |                 |       |             |          |      |
| २. म मेरो मांसपेशी कक्रक्क परेको र दुखेको महशुस गर्छु ।                        |                 |       |             |          |      |
| ३. मलाई तनाबको दौरा पर्छ ।                                                     |                 |       |             |          |      |
| ४. म आफ्नो दारा किट्छु अथवा कस्छु ।                                            |                 |       |             |          |      |
| ५. मलाई पखाला र / वा कब्जियतको समस्या छ ।                                      |                 |       |             |          |      |
| ६. मलाई मेरो दैनिक कार्य गर्न मद्दत चाहिन्छ ।                                  |                 |       |             |          |      |
| ७. तेजिलो प्रकाशप्रति म संवेदनशील छु ।                                         |                 |       |             |          |      |
| ८. जब म शारीरिक रुपले सक्रिय हुन्छु, म धेरै सजिलै थाक्छु ।                     |                 |       |             |          |      |
| ९. म मेरो पुरै शरीरमा दुखाई महशुस गर्छु ।                                      |                 |       |             |          |      |
| १०. मलाई टाउको दुख्ने समस्याहरु छ ।                                            |                 |       |             |          |      |
| ११. जब म पिसाब फेर्छु, मेरो मुत्रथैलीमा असजिलो अथवा पोलेको महशुस गर्छु ।       |                 |       |             |          |      |
| १२. म राम्रोसँग सुत्दिनँ ।                                                     |                 |       |             |          |      |
| १३. मलाई एकाग्रता (ध्यान) पुर्याउन गाह्रो छ ।                                  |                 |       |             |          |      |
| १४. मलाई छालाको समस्या छ, जस्तै फुस्रोपन, चिलाउने अथवा रातो (डाबर) हुने ।      |                 |       |             |          |      |
| १५. तनाबले मेरो शारीरिक लक्षणहरु बढ्छ ।                                        |                 |       |             |          |      |
| १६. म दुःखी वा उदास महशुस गर्छु ।                                              |                 |       |             |          |      |
| १७. मेरो शारीरिक उर्जामा कमि छ ।                                               |                 |       |             |          |      |
| १८. मेरो गर्दन र काँधका मांसपेशीमा कडापन छ ।                                   |                 |       |             |          |      |
| १९. मेरो बंगाराको जोर्नी तथा मांसपेशीमा दुखाई छ ।                              |                 |       |             |          |      |
| २०. केहि गन्धहरु जस्तै अत्तरले मलाई रिगटा र वाकवाकि महशुस गराउँछ ।             |                 |       |             |          |      |
| २१. मलाई बारम्बार पिसाब फेर्नु पर्छ ।                                          |                 |       |             |          |      |
| २२. जब म राति निदाउन कोशिस गर्छु, मेरो खुट्टाहरुमा असहज र बेचैनी महशुस गर्छु । |                 |       |             |          |      |
| २३. मलाई कुराहरु सम्झिन गाह्रो हुन्छ ।                                         |                 |       |             |          |      |
| २४. बाल्य अवस्थामा मैले (मानसिक वा शारिरीक) चोट भोगेको छु ।                    |                 |       |             |          |      |
| २५. मेरो दुई कट्टीको बीचको भागमा (अथवा गुप्ताङ्गमा) दुखाई छ ।                  |                 |       |             |          |      |
|                                                                                |                 |       |             |          |      |
| <b>जम्मा अंक</b>                                                               |                 |       |             |          |      |

### The Nepali translation of the Central Sensitization Inventory (CSI)

Available from Sharma S, Jha J, Pathak P, Neblett R. Translation, cross-cultural adaptation, and measurement properties of the Nepali version of the Central Sensitization Inventory (CSI). 2020. BMC Neurology. <https://doi.org/10.1186/s12883-020-01867-1>

## सेन्ट्रल सेन्सीटाइजेसन इनभेनटोरी (भाग - ख)

नाम: \_\_\_\_\_

मिति: \_\_\_\_\_

के तपाईंलाई तपाईंको डाक्टरले तल मध्यको कुनै समस्या रहेको भनेर औल्याउनु भएको छ? कृपया हरेक स्वास्थ्य समस्याको दायँतिर रहेको उचित उत्तरमा (✓)चिन्ह लगाउनुहोस् र समस्याको निदान भएको वर्ष पनि लेख्नुहोस् ।

|    | स्वास्थ्य समस्याहरू                                | छैन | छ | पत्ता लागेको मिति लेख्नुहोस् |
|----|----------------------------------------------------|-----|---|------------------------------|
| १  | रेस्टलेस लेग सिन्ड्रोम                             |     |   |                              |
| २  | क्रोनिक फटिग सिन्ड्रोम                             |     |   |                              |
| ३  | फाइब्रोमायाल्जिया                                  |     |   |                              |
| ४  | टेम्पोरोम्यान्डिबुलर जोइन्ट डिसअर्डर               |     |   |                              |
| ५  | माइग्रेन वा टेन्सन हेडएक (टाउको दुख्ने समस्या)     |     |   |                              |
| ६  | इरिटेबल बावल सिन्ड्रोम                             |     |   |                              |
| ७  | मल्टिपल केमिकल सेन्सिटिविटी                        |     |   |                              |
| ८  | गर्दनको चोट (जस्तै विप्ल्याश)                      |     |   |                              |
| ९  | एन्जाइटी वा प्यानिक अट्याक (चिन्ता वा तनावको दौरा) |     |   |                              |
| १० | डिप्रेसन (उदासिन्ता)                               |     |   |                              |

### The Nepali translation of the Central Sensitization Inventory (CSI)

Available from Sharma S, Jha J, Pathak P, Neblett R. Translation, cross-cultural adaptation, and measurement properties of the Nepali version of the Central Sensitization Inventory (CSI). 2020. BMC Neurology. <https://doi.org/10.1186/s12883-020-01867-1>
