# Supplementary material for: Translation, cross-cultural adaptation, and measurement properties of the Nepali version of the central sensitization inventory (CSI)
Source: PubMed Central journal article supplement (PMC7385946; doi:10.1186/s12883-020-01867-1), 2020-07-27
Supplement: 12883_2020_1867_MOESM2_ESM.pdf [file 12883_2020_1867_MOESM2_ESM.pdf]

## CENTRAL SENSITIZATION INVENTORY: PART A

Name: \_\_\_\_\_

Date: \_\_\_\_\_

**Please circle the best response to the right of each statement.**

|    |                                                                                   |       |        |           |               |        |
|----|-----------------------------------------------------------------------------------|-------|--------|-----------|---------------|--------|
| 1  | I feel tired and unrefreshed when I wake from sleeping.                           | Never | Rarely | Sometimes | Often         | Always |
| 2  | My muscles feel stiff and achy.                                                   | Never | Rarely | Sometimes | Often         | Always |
| 3  | I have anxiety attacks.                                                           | Never | Rarely | Sometimes | Often         | Always |
| 4  | I grind or clench my teeth.                                                       | Never | Rarely | Sometimes | Often         | Always |
| 5  | I have problems with diarrhea and/or constipation.                                | Never | Rarely | Sometimes | Often         | Always |
| 6  | I need help in performing my daily activities.                                    | Never | Rarely | Sometimes | Often         | Always |
| 7  | I am sensitive to bright lights.                                                  | Never | Rarely | Sometimes | Often         | Always |
| 8  | I get tired very easily when I am physically active.                              | Never | Rarely | Sometimes | Often         | Always |
| 9  | I feel pain all over my body.                                                     | Never | Rarely | Sometimes | Often         | Always |
| 10 | I have headaches.                                                                 | Never | Rarely | Sometimes | Often         | Always |
| 11 | I feel discomfort in my bladder and/or burning when I urinate.                    | Never | Rarely | Sometimes | Often         | Always |
| 12 | I do not sleep well.                                                              | Never | Rarely | Sometimes | Often         | Always |
| 13 | I have difficulty concentrating.                                                  | Never | Rarely | Sometimes | Often         | Always |
| 14 | I have skin problems such as dryness, itchiness, or rashes.                       | Never | Rarely | Sometimes | Often         | Always |
| 15 | Stress makes my physical symptoms get worse.                                      | Never | Rarely | Sometimes | Often         | Always |
| 16 | I feel sad or depressed.                                                          | Never | Rarely | Sometimes | Often         | Always |
| 17 | I have low energy.                                                                | Never | Rarely | Sometimes | Often         | Always |
| 18 | I have muscle tension in my neck and shoulders.                                   | Never | Rarely | Sometimes | Often         | Always |
| 19 | I have pain in my jaw.                                                            | Never | Rarely | Sometimes | Often         | Always |
| 20 | Certain smells, such as perfumes, make me feel dizzy and nauseated.               | Never | Rarely | Sometimes | Often         | Always |
| 21 | I have to urinate frequently.                                                     | Never | Rarely | Sometimes | Often         | Always |
| 22 | My legs feel uncomfortable and restless when I am trying to go to sleep at night. | Never | Rarely | Sometimes | Often         | Always |
| 23 | I have difficulty remembering things.                                             | Never | Rarely | Sometimes | Often         | Always |
| 24 | I suffered trauma as a child.                                                     | Never | Rarely | Sometimes | Often         | Always |
| 25 | I have pain in my pelvic area.                                                    | Never | Rarely | Sometimes | Often         | Always |
|    |                                                                                   |       |        |           |               |        |
|    |                                                                                   |       |        |           | <b>Total=</b> |        |

## CENTRAL SENSITIZATION INVENTORY: PART B

Name: \_\_\_\_\_

Date: \_\_\_\_\_

**Have you been diagnosed by a doctor with any of the following disorders?**

**Please check the box to the right for each diagnosis and write the year of the diagnosis.**

|    |                                        | NO | YES | Year Diagnosed |
|----|----------------------------------------|----|-----|----------------|
| 1  | Restless Leg Syndrome                  |    |     |                |
| 2  | Chronic Fatigue Syndrome               |    |     |                |
| 3  | Fibromyalgia                           |    |     |                |
| 4  | Temporomandibular Joint Disorder (TMJ) |    |     |                |
| 5  | Migraine or tension headaches          |    |     |                |
| 6  | Irritable Bowel Syndrome               |    |     |                |
| 7  | Multiple Chemical Sensitivities        |    |     |                |
| 8  | Neck Injury (including whiplash)       |    |     |                |
| 9  | Anxiety or Panic Attacks               |    |     |                |
| 10 | Depression                             |    |     |                |
